# Supplementary material for: 1,5,6-Trimethoxy-2,7-dihydroxyphenanthrene from Dendrobium officinale Exhibited Antitumor Activities for HeLa Cells
Source: MDPI journal article supplement (doi:10.3390/ijms242015375), 2023-10-19
Supplement: s1 [file s1]

## Supplementary Material

# 1,5,6-Trimethoxy-2,7-dihydroxyphenanthrene from *Dendrobium officinale* Exhibited Antitumor Activities for HeLa Cells

Chong Liang <sup>1</sup>, Chonglun Zhang <sup>2</sup>, Yinlin Zhuo <sup>1</sup>, Baocheng Gong <sup>1</sup>, Weizhuo Xu <sup>3,\*</sup> and  
Guogang Zhang <sup>1,\*</sup>

<sup>1</sup> School of Traditional Chinese Materia Medica, Shenyang Pharmaceutical University, 103 Wenhua Road, Shenhe District, Shenyang 110016, China; liangchong7628@163.com (C.L.); 18750097073@163.com (Y.Z.); gkcmu\_1h@163.com (B.G.)

<sup>2</sup> School of Life Sciences and Biopharmaceuticals, Shenyang Pharmaceutical University, 103 Wenhua Road, Shenhe District, Shenyang 110016, China; zhangcl0630@163.com

<sup>3</sup> School of Functional Food and Wine, Shenyang Pharmaceutical University, 103 Wenhua Road, Shenhe District, Shenyang 110016, China

\* Correspondence: weizhuo.xu@syphu.edu.cn (W.X.); zggth@163.com (G.Z.); Tel./Fax: +86-024-43520301 (W.X.); +86-024-43520735 (G.Z.)

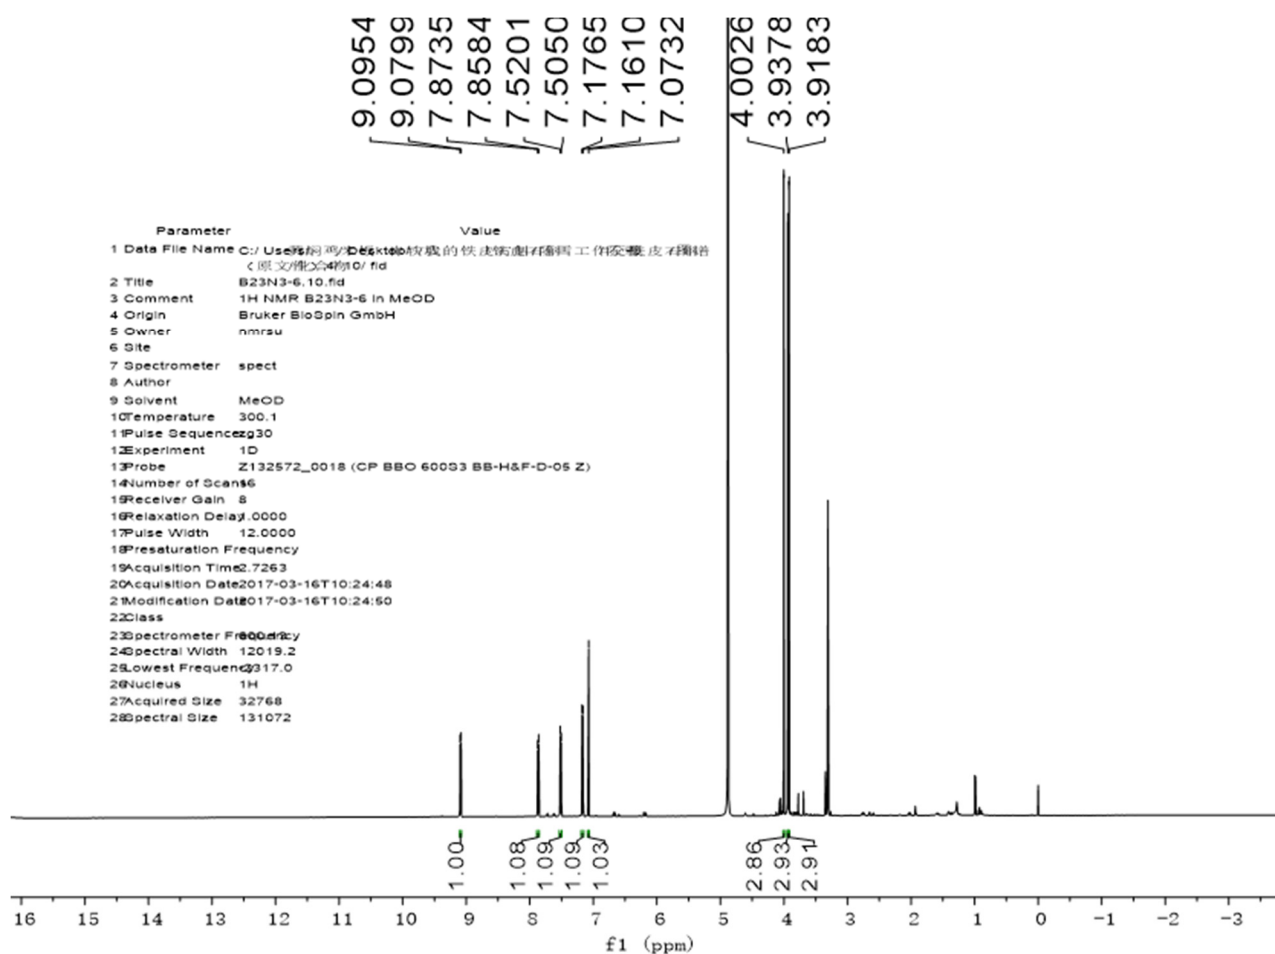

Figure S1. <sup>1</sup>H NMR spectrum for compound 5.

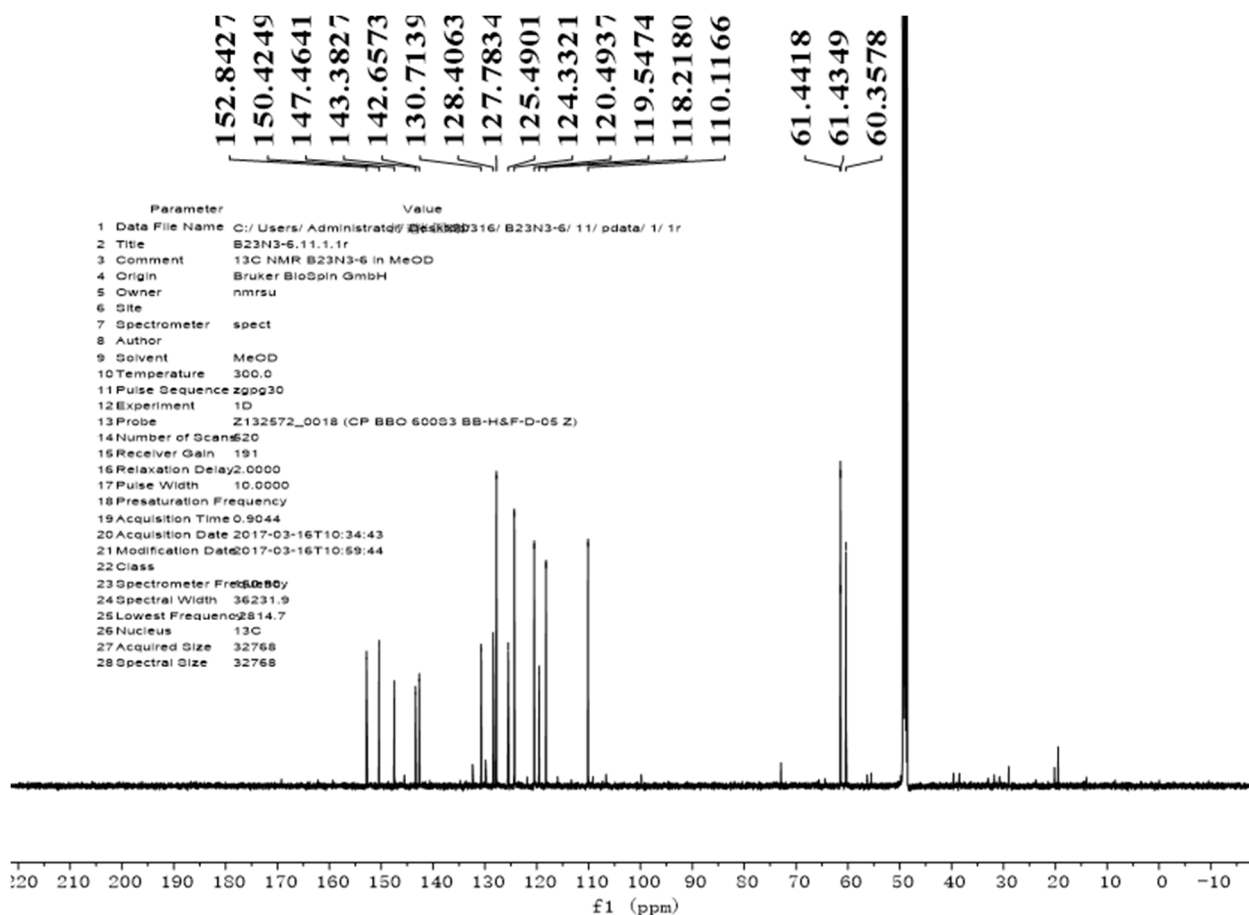

**Figure S2.**  $^{13}\text{C}$  NMR spectrum for compound 5.

the first  
time

| DMSO  | 3.125 $\mu\text{M}$ | 6.25 $\mu\text{M}$ | 12.5 $\mu\text{M}$ | 25 $\mu\text{M}$ | 50 $\mu\text{M}$ | 100 $\mu\text{M}$ |
|-------|---------------------|--------------------|--------------------|------------------|------------------|-------------------|
| 0.577 | 0.161               | 0.148              | 0.114              | 0.116            | 0.111            | 0.126             |
| 0.534 | 0.171               | 0.144              | 0.119              | 0.115            | 0.109            | 0.128             |
| 0.498 | 0.163               | 0.131              | 0.113              | 0.116            | 0.109            | 0.134             |

the second  
time

| DMSO  | 3.125 $\mu\text{M}$ | 6.25 $\mu\text{M}$ | 12.5 $\mu\text{M}$ | 25 $\mu\text{M}$ | 50 $\mu\text{M}$ | 100 $\mu\text{M}$ |
|-------|---------------------|--------------------|--------------------|------------------|------------------|-------------------|
| 0.543 | 0.303               | 0.189              | 0.152              | 0.123            | 0.1              | 0.105             |
| 0.714 | 0.352               | 0.226              | 0.171              | 0.129            | 0.11             | 0.109             |
| 0.599 | 0.303               | 0.213              | 0.157              | 0.135            | 0.097            | 0.111             |

the third  
time

| DMSO  | 3.125 $\mu\text{M}$ | 6.25 $\mu\text{M}$ | 12.5 $\mu\text{M}$ | 25 $\mu\text{M}$ | 50 $\mu\text{M}$ | 100 $\mu\text{M}$ |
|-------|---------------------|--------------------|--------------------|------------------|------------------|-------------------|
| 0.647 | 0.318               | 0.206              | 0.161              | 0.12             | 0.102            | 0.115             |
| 0.636 | 0.308               | 0.185              | 0.123              | 0.114            | 0.097            | 0.105             |
| 0.618 | 0.243               | 0.147              | 0.12               | 0.133            | 0.099            | 0.114             |

**Figure S3.** OD value of compound 5 at 490nm.

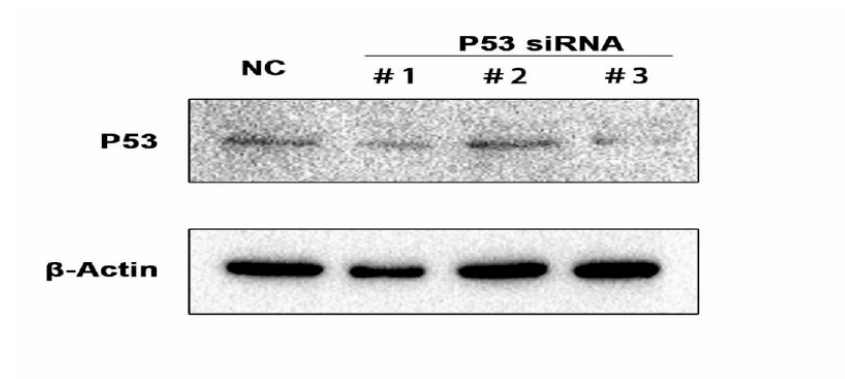

**Figure S4.** Expression of p53 after siRNA treatment
